# Supplementary material
Source: publisher figshare collection journal article supplement (https://karger.figshare.com/articles/dataset/_/5822046)
Supplement: Supplementary file 1 [file 1]

Archive with 3 entries (3 files):
- DEM484477_sm1.pdf
- DEM484477_sm3.pdf
- DEM484477_sm2.pdf
