# Supplementary material
Source: publisher figshare collection journal article supplement (https://karger.figshare.com/articles/dataset/_/5822046)
Supplement: Supplementary file 1 [file 1 › DEM484477_sm1.pdf]

**Supplemental Figure. Interval between index-stroke and each K-VCIHS-NP evaluation**

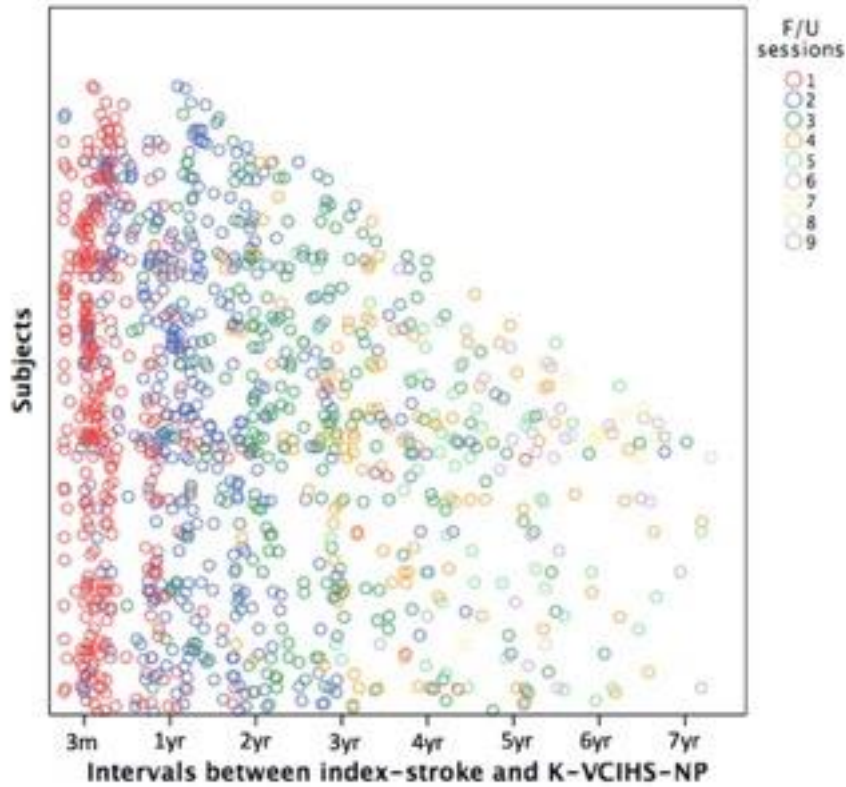

Each circle denotes the interval between index-stroke and K-VCIHS-NP evaluations. Each color indicates the order of the test.

Abbreviations: F/U (follow-up), yr (year), K-VCIHS-NP (Korean Vascular Cognitive Impairment Harmonization Standards: Neuropsychology Protocol)
