# Supplementary material
Source: publisher figshare collection journal article supplement (https://karger.figshare.com/articles/dataset/_/5822046)
Supplement: Supplementary file 1 [file 1 › DEM484477_sm3.pdf]

**Supplemental Table I. Baseline characteristics of total eligible study subjects**

|                       | Study subjects<br>(n=375) | Stroke patients with<br>K-VCIHs-NP<br>evaluation only once<br>(n=539) | P-<br>value <sup>†</sup> | Stroke patients without K-<br>VCIHs-NP evaluation<br>(n=3856) | P-<br>value <sup>†</sup> |
|-----------------------|---------------------------|-----------------------------------------------------------------------|--------------------------|---------------------------------------------------------------|--------------------------|
| Age                   | 69.1±9.7                  | 68.9±11.1                                                             | 0.77                     | 67.2±13.4                                                     | 0.01                     |
| Male                  | 223 (59.6)                | 383 (61.7)                                                            | 0.52                     | 2663 (59.5)                                                   | 0.96                     |
| NIHSS at<br>admission | 4.7±5.1                   | 4.4±4.8                                                               | 0.48                     | 5.8±6.7                                                       | <0.01                    |
| Education             | 9.4±5.5                   | 9.6±5.5                                                               | 0.60                     | 9.8±5.1                                                       | 0.20                     |

<sup>†</sup> Compared to the study subjects

Abbreviations: K-VCIHs-NP (Korean version of the Vascular Cognitive Impairment Harmonization Standards-Neuropsychology Protocol), NIHSS (National Institutes of Health Stroke Scale)

**Supplemental Table II. Numbers and intervals of follow-up evaluations of eligible study subjects**

|             | Study subjects<br>(n=375) | Follow-up intervals<br>(days, median) |
|-------------|---------------------------|---------------------------------------|
| Baseline    | 375 (100.0)               |                                       |
| Follow-up 1 | 375 (100.0)               | 153                                   |
| Follow-up 2 | 212 (56.5)                | 567                                   |
| Follow-up 3 | 101 (26.9)                | 961                                   |
| Follow-up 4 | 56 (14.9)                 | 1339                                  |
| Follow-up 5 | 30 (8.0)                  | 1666                                  |
| Follow-up 6 | 11 (2.9)                  | 2023                                  |
| Follow-up 7 | 3 (0.8)                   | 2361                                  |

**Supplemental Table III. Domain-specific z-score throughout the all K-VCIHS-NP sessions**

|                           | No. | Range | Min    | Max  | Mean  | SD   |
|---------------------------|-----|-------|--------|------|-------|------|
| <b>Executive</b>          |     |       |        |      |       |      |
| Baseline                  | 375 | 8.00  | -6.45  | 1.54 | -1.90 | 1.63 |
| 1 <sup>st</sup> follow-up | 365 | 8.25  | -6.76  | 1.49 | -1.83 | 1.56 |
| 2 <sup>nd</sup> follow-up | 215 | 8.96  | -6.98  | 1.98 | -2.15 | 1.76 |
| 3 <sup>rd</sup> follow-up | 105 | 8.88  | -7.10  | 1.78 | -2.66 | 1.73 |
| 4 <sup>th</sup> follow-up | 57  | 9.30  | -7.29  | 2.01 | -3.22 | 1.92 |
| 5 <sup>th</sup> follow-up | 30  | 8.34  | -7.33  | 1.02 | -3.49 | 1.98 |
| 6 <sup>th</sup> follow-up | 11  | 9.30  | -7.29  | 2.01 | -3.22 | 1.92 |
| <b>Memory</b>             |     |       |        |      |       |      |
| Baseline                  | 375 | 7.56  | -5.46  | 2.10 | -1.52 | 1.31 |
| 1 <sup>st</sup> follow-up | 366 | 7.95  | -5.46  | 2.49 | -1.29 | 1.32 |
| 2 <sup>nd</sup> follow-up | 214 | 8.10  | -5.46  | 2.64 | -1.38 | 1.37 |
| 3 <sup>rd</sup> follow-up | 105 | 7.68  | -5.46  | 2.22 | -1.78 | 1.32 |
| 4 <sup>th</sup> follow-up | 57  | 5.70  | -4.87  | 0.84 | -2.12 | 1.20 |
| 5 <sup>th</sup> follow-up | 30  | 5.82  | -5.46  | 0.35 | -1.95 | 1.31 |
| 6 <sup>th</sup> follow-up | 11  | 4.14  | -3.79  | 0.35 | -1.60 | 1.29 |
| <b>Visuospatial</b>       |     |       |        |      |       |      |
| Baseline                  | 369 | 15.28 | -14.25 | 1.03 | -2.01 | 2.39 |
| 1 <sup>st</sup> follow-up | 365 | 16.46 | -15.37 | 1.10 | -1.80 | 2.47 |
| 2 <sup>nd</sup> follow-up | 212 | 15.30 | -14.25 | 1.05 | -2.11 | 2.50 |
| 3 <sup>rd</sup> follow-up | 104 | 13.40 | -12.64 | 0.76 | -2.49 | 2.78 |
| 4 <sup>th</sup> follow-up | 57  | 16.92 | -16.04 | 0.87 | -3.18 | 3.32 |
| 5 <sup>th</sup> follow-up | 30  | 16.17 | -16.04 | 0.13 | -4.25 | 3.85 |
| 6 <sup>th</sup> follow-up | 11  | 10.82 | -10.06 | 0.76 | -2.94 | 3.35 |
| <b>Language</b>           |     |       |        |      |       |      |
| Baseline                  | 374 | 9.76  | -8.36  | 1.40 | -1.27 | 1.57 |

|                           |     |       |       |      |       |      |
|---------------------------|-----|-------|-------|------|-------|------|
| 1 <sup>st</sup> follow-up | 366 | 8.67  | -7.06 | 1.61 | -1.09 | 1.47 |
| 2 <sup>nd</sup> follow-up | 214 | 10.92 | -9.20 | 1.72 | -1.35 | 1.70 |
| 3 <sup>rd</sup> follow-up | 105 | 9.70  | -8.39 | 1.31 | -1.54 | 1.80 |
| 4 <sup>th</sup> follow-up | 57  | 9.56  | -8.39 | 1.17 | -2.07 | 1.94 |
| 5 <sup>th</sup> follow-up | 30  | 9.30  | -7.58 | 1.72 | -2.15 | 2.09 |
| 6 <sup>th</sup> follow-up | 11  | 5.72  | -5.65 | 0.07 | -1.88 | 1.73 |

---

Abbreviations: K-VCIHs-NP (Korean version of the Vascular Cognitive Impairment Harmonization Standards-Neuropsychology Protocol), No (number of subjects), Min (minimum), Max (maximum), SD (standard deviation)

**Supplemental Table IV. Characteristics of longitudinal cognitive z-score change values**

| Follow-ups          | No. of subjects | Range | Min    | Max   | Mean  | SD   |
|---------------------|-----------------|-------|--------|-------|-------|------|
| <b>Executive</b>    |                 |       |        |       |       |      |
| 1 <sup>st</sup>     | 365             | 10.23 | -3.79  | 6.44  | 0.08  | 1.04 |
| 2 <sup>nd</sup>     | 215             | 9.95  | -5.1   | 4.85  | 0.11  | 1.19 |
| 3 <sup>rd</sup>     | 105             | 9.34  | -4.49  | 4.85  | -0.18 | 1.46 |
| 4 <sup>th</sup>     | 57              | 9.94  | -5.48  | 4.46  | -0.50 | 1.53 |
| 5 <sup>th</sup>     | 30              | 7.02  | -5.5   | 1.52  | -0.66 | 1.65 |
| <b>Memory</b>       |                 |       |        |       |       |      |
| 1 <sup>st</sup>     | 366             | 5.84  | -2.27  | 3.58  | 0.23  | 0.96 |
| 2 <sup>nd</sup>     | 214             | 7.26  | -4.03  | 3.23  | 0.31  | 1.08 |
| 3 <sup>rd</sup>     | 105             | 6.99  | -2.15  | 4.84  | 0.26  | 1.05 |
| 4 <sup>th</sup>     | 57              | 5.38  | -2.69  | 2.69  | 0.02  | 0.92 |
| 5 <sup>th</sup>     | 30              | 3.27  | -1.04  | 2.23  | 0.34  | 0.95 |
| <b>Visuospatial</b> |                 |       |        |       |       |      |
| 1 <sup>st</sup>     | 360             | 24.33 | -13.6  | 10.73 | 0.20  | 2.13 |
| 2 <sup>nd</sup>     | 210             | 19.75 | -8.27  | 11.48 | 0.22  | 2.26 |
| 3 <sup>rd</sup>     | 103             | 22.18 | -10.7  | 11.48 | 0.13  | 2.73 |
| 4 <sup>th</sup>     | 56              | 17.54 | -11.73 | 5.81  | -0.54 | 3.33 |
| 5 <sup>th</sup>     | 30              | 16.41 | -10.19 | 6.22  | -1.27 | 3.56 |
| <b>Language</b>     |                 |       |        |       |       |      |
| 1 <sup>st</sup>     | 366             | 9.42  | -4.25  | 5.17  | 0.18  | 0.90 |
| 2 <sup>nd</sup>     | 214             | 7.89  | -3.23  | 4.66  | 0.13  | 1.07 |
| 3 <sup>rd</sup>     | 105             | 8.41  | -3.24  | 5.17  | 0.17  | 1.26 |
| 4 <sup>th</sup>     | 57              | 11.21 | -5.52  | 5.69  | -0.05 | 1.61 |
| 5 <sup>th</sup>     | 30              | 5.98  | -3.74  | 2.24  | -0.04 | 1.17 |

Mean intervals after index-stroke for the 1<sup>st</sup>, 2<sup>nd</sup>, 3<sup>rd</sup>, 4<sup>th</sup>, and 5<sup>th</sup> follow-up evaluations are 1.8, 2.9, 4.0, 4.7, and 5.5 years, respectively.

Abbreviations: No (number), Min (minimum), Max (maximum), SD (standard deviation)

**Supplemental Table V. Characteristics of z-score change values in memory domain according to the presence of medial temporal lobe atrophy and APOE e4 genotype**

| Follow-ups            | No. | Memory |       |      |       |      |
|-----------------------|-----|--------|-------|------|-------|------|
|                       |     | Range  | Min   | Max  | Mean  | SD   |
| <b>MTLA grade 3-5</b> |     |        |       |      |       |      |
| 1 <sup>st</sup>       | 43  | 3.27   | -2.27 | 1.01 | 0.11  | 0.60 |
| 2 <sup>nd</sup>       | 31  | 2.55   | -1.36 | 1.19 | 0.11  | 0.59 |
| 3 <sup>rd</sup>       | 19  | 2.29   | -0.50 | 1.79 | 0.30  | 0.62 |
| 4 <sup>th</sup>       | 12  | 1.49   | -0.49 | 1.00 | 0.17  | 0.44 |
| 5 <sup>th</sup>       | 7   | 2.01   | 0.00  | 2.01 | 0.36  | 0.75 |
| <b>MTLA grade 0-2</b> |     |        |       |      |       |      |
| 1 <sup>st</sup>       | 323 | 5.52   | -1.94 | 3.58 | 0.25  | 1.00 |
| 2 <sup>nd</sup>       | 183 | 7.26   | -4.03 | 3.23 | 0.35  | 1.13 |
| 3 <sup>rd</sup>       | 86  | 6.99   | -2.15 | 4.84 | 0.25  | 1.13 |
| 4 <sup>th</sup>       | 45  | 5.38   | -2.69 | 2.69 | -0.02 | 1.01 |
| 5 <sup>th</sup>       | 23  | 3.27   | -1.04 | 2.23 | 0.33  | 1.02 |
| <b>MTLA grade 2-5</b> |     |        |       |      |       |      |
| 1 <sup>st</sup>       | 107 | 4.34   | -2.27 | 2.08 | 0.10  | 0.75 |
| 2 <sup>nd</sup>       | 75  | 5.57   | -2.35 | 3.23 | 0.17  | 0.94 |
| 3 <sup>rd</sup>       | 40  | 4.23   | -2.15 | 2.08 | 0.06  | 0.83 |
| 4 <sup>th</sup>       | 24  | 2.11   | -1.08 | 1.04 | -0.06 | 0.55 |
| 5 <sup>th</sup>       | 13  | 2.67   | -0.52 | 2.15 | 0.40  | 0.80 |
| <b>MTLA grade 0-1</b> |     |        |       |      |       |      |
| 1 <sup>st</sup>       | 259 | 5.52   | -1.94 | 3.58 | 0.28  | 1.03 |
| 2 <sup>nd</sup>       | 139 | 6.63   | -4.03 | 2.60 | 0.39  | 1.14 |
| 3 <sup>rd</sup>       | 65  | 6.92   | -2.08 | 4.84 | 0.39  | 1.16 |
| 4 <sup>th</sup>       | 33  | 5.38   | -2.69 | 2.69 | 0.08  | 1.11 |
| 5 <sup>th</sup>       | 17  | 3.27   | -1.04 | 2.23 | 0.29  | 1.08 |
| <b>APOE e4 (+)</b>    |     |        |       |      |       |      |
| 1 <sup>st</sup>       | 45  | 3.64   | -1.56 | 2.08 | 0.26  | 0.83 |
| 2 <sup>nd</sup>       | 31  | 6.04   | -4.03 | 2.01 | 0.19  | 1.19 |
| 3 <sup>rd</sup>       | 17  | 4.23   | -2.15 | 2.08 | 0.08  | 0.99 |
| 4 <sup>th</sup>       | 8   | 2.04   | -1.00 | 1.04 | 0.20  | 0.81 |
| 5 <sup>th</sup>       | 5   | 2.55   | -0.54 | 2.01 | 0.39  | 0.97 |
| <b>APOE e4 (-)</b>    |     |        |       |      |       |      |
| 1 <sup>st</sup>       | 191 | 5.05   | -2.27 | 2.78 | 0.20  | 0.97 |
| 2 <sup>nd</sup>       | 119 | 5.82   | -2.60 | 3.23 | 0.31  | 1.08 |
| 3 <sup>rd</sup>       | 64  | 6.92   | -2.08 | 4.84 | 0.26  | 1.11 |
| 4 <sup>th</sup>       | 39  | 4.14   | -1.46 | 2.69 | 0.13  | 0.84 |
| 5 <sup>th</sup>       | 22  | 3.20   | -0.97 | 2.23 | 0.44  | 0.97 |

Mean intervals for each follow-up evaluation is 1.8, 2.9, 4.0, 4.7, 5.5 years after index-stroke.

Abbreviations: No (number), Min (minimum), Max (maximum), SD (standard deviation), MTLA (medial temporal lobe atrophy)

**Supplementary Table VI. Correlations among cognitive domains in the multivariate mixed model using z-scores changes**

|                        | Rho  | SE   | p     |
|------------------------|------|------|-------|
| Executive:Memory       | 0.41 | 0.09 | <0.01 |
| Executive:Visuospatial | 0.52 | 0.07 | <0.01 |
| Executive:Language     | 0.51 | 0.07 | <0.01 |
| Memory:Visuospatial    | 0.31 | 0.09 | <0.01 |
| Memory:Language        | 0.44 | 0.09 | <0.01 |
| Visuospatial:Language  | 0.48 | 0.08 | <0.01 |
